# Supplementary material for: Catalytic consequences of micropore topology, mesoporosity, and acidity on the hydrolysis of sucrose over zeolite catalysts
Source: Royal Society of Chemistry journal article supplement (doi:10.1039/c4cy00360h), 2014-05-02
Supplement: c4cy00360h1.pdf [file c4cy00360h1.pdf]

*Supplementary Information for*

**Catalytic Consequences of Micropore Topology, Mesoporosity, and Acidity on the Hydrolysis of Sucrose over Zeolite Catalysts**

Yao He,<sup>ab</sup> Thomas Hoff,<sup>a</sup> Laleh Emdadi,<sup>a</sup> Yiqing Wu,<sup>a</sup> Judicael Bouraima,<sup>a</sup> and Dongxia Liu<sup>\*a</sup>

a. Department of Chemical and Biomolecular Engineering, University of Maryland, College Park, MD, United States, 20742

b. Institute of Clean Energy Utilization, School of Electric Power, South China University of Technology, Guangzhou, China, 510640

\*Corresponding author:

Prof. Dongxia Liu

Email: liud@umd.edu

Phone: (+1) 301-405-3522

Fax: (+1) 301-405-0523

**Table S1.** Rate constant of hydrolysis of sucrose in zeolites with a variety of micropore topology, mesoporosity, and acidity (Si/Al ratio).

| Zeolite             |                           |                          | Measured rate constant ( $k_{hydro}$ , x $10^3$ , s <sup>-1</sup> (mol H <sup>+</sup> ) <sup>-1</sup> ) <sup>b</sup> |       |       |       |     |
|---------------------|---------------------------|--------------------------|----------------------------------------------------------------------------------------------------------------------|-------|-------|-------|-----|
| Topology            | Name                      | Si/Al ratio <sup>a</sup> | 343 K                                                                                                                | 352 K | 358 K | 364 K |     |
| Medium-pore         | FER                       | 28                       | 2.99                                                                                                                 | 5.57  | 12.9  | 25.7  |     |
|                     | MFI                       | 12                       | -                                                                                                                    | 6.25  | -     | -     |     |
|                     |                           | 40                       | 8.11                                                                                                                 | 26.7  | 40.5  | 72.9  |     |
|                     |                           | 70                       | 7.99                                                                                                                 | 15.3  | 29.7  | 69.5  |     |
| Large-pore          | MOR                       | 45                       | 6.94                                                                                                                 | 13.4  | 40.2  | 72.8  |     |
|                     | MWW                       | 20                       | 7.53                                                                                                                 | 33.2  | 53.9  | 93.8  |     |
|                     |                           | 30                       | 14.6                                                                                                                 | 41.0  | 79.5  | 186   |     |
|                     | BEA                       | 12                       | -                                                                                                                    | 6.37  | -     | -     |     |
|                     |                           | 19                       | 3.90                                                                                                                 | 13.2  | 28.1  | 39.5  |     |
|                     |                           | 100                      | 43.5                                                                                                                 | 122   | 331   | 538   |     |
|                     | FAU                       | 15                       | 84.5                                                                                                                 | 299   | 818   | 1225  |     |
|                     |                           | 40                       | 691                                                                                                                  | 2435  | 4853  | 7794  |     |
|                     | Mesopore                  | PMFI                     | 69                                                                                                                   | 24.3  | 51.8  | 222   | 255 |
|                     |                           |                          | 150                                                                                                                  | -     | 144   | -     | -   |
| 200                 |                           |                          | -                                                                                                                    | 86    | -     | -     |     |
| PMWW                |                           | 30                       | 25.3                                                                                                                 | 94    | 189   | 322   |     |
| Industrial standard | Amberlyst-15 <sup>c</sup> | -                        | 121                                                                                                                  | 214   | 274   | 463   |     |

<sup>a</sup> Determined from elemental analysis (ICP-OES). <sup>b</sup> Errors are within  $\pm 7\%$  of the measured rate constant.

<sup>c</sup> Purchased from Alfa Aesar. The number of acid sites is  $4.7 \times 10^{-3}$  mol H<sup>+</sup> per gram of the catalyst.

Left: Conversion vs. reaction time

Right:  $\ln(C_A^0/C_A)$  vs. reaction time

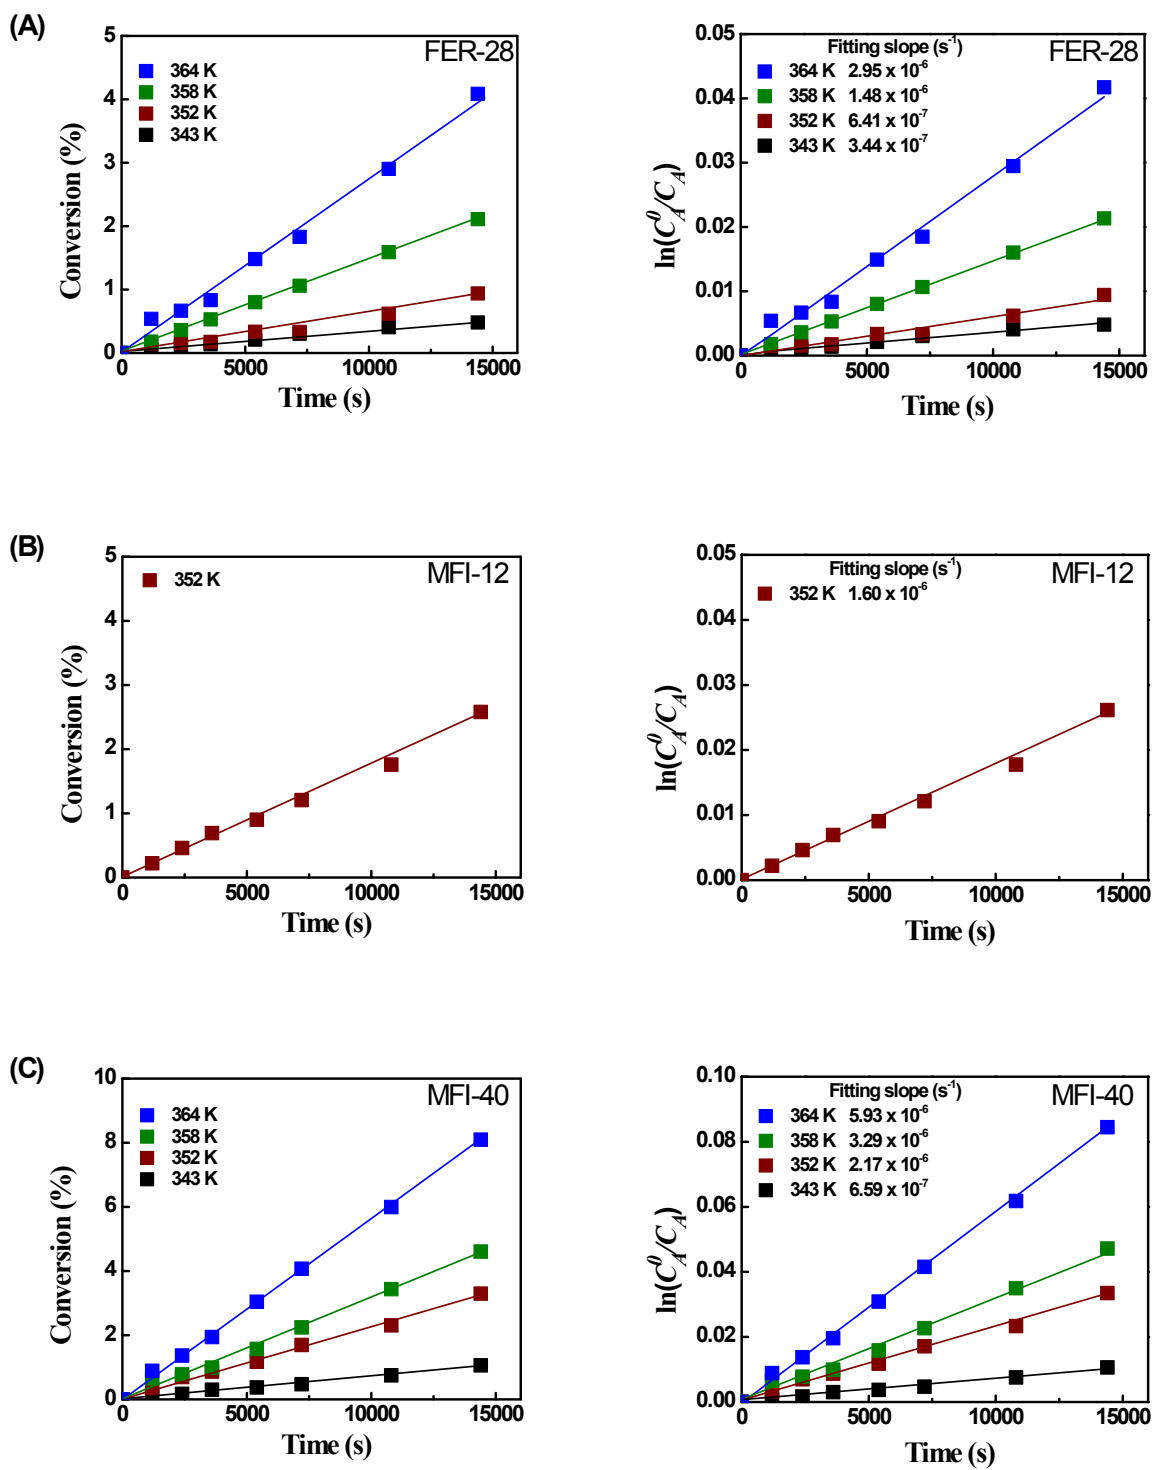

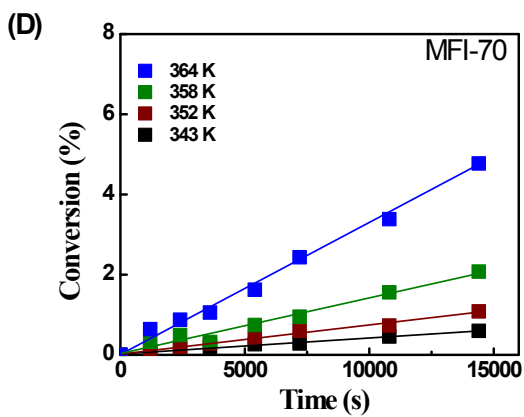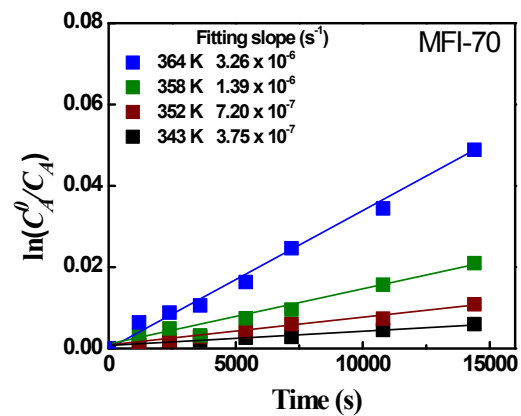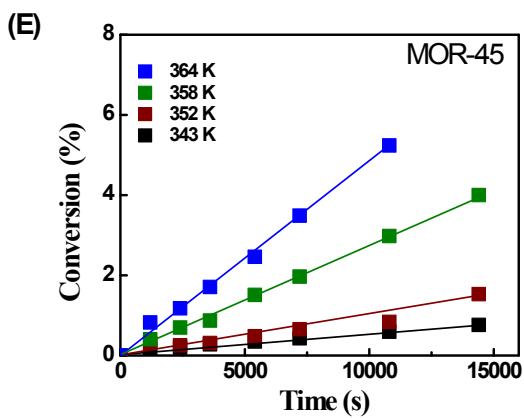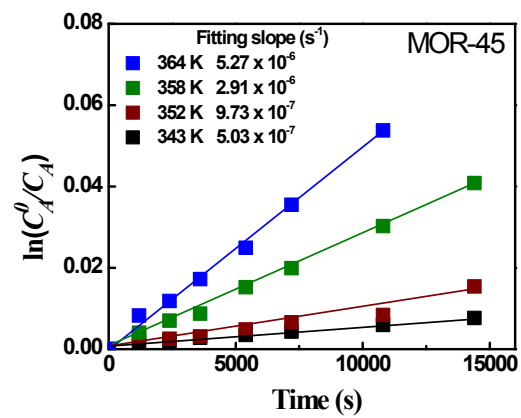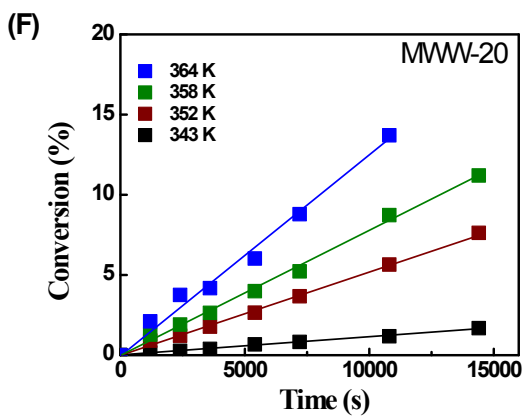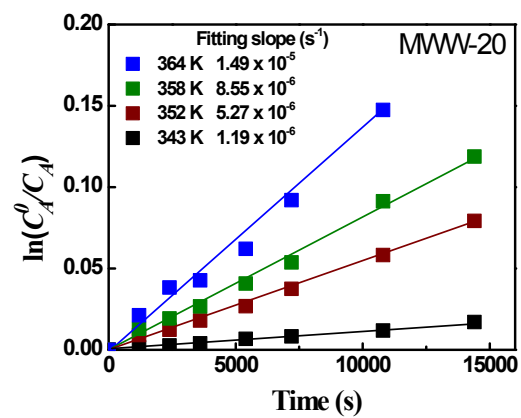

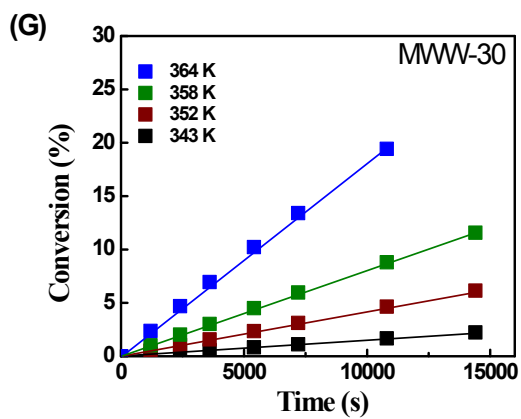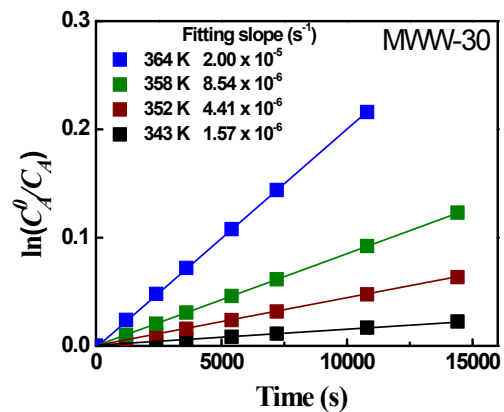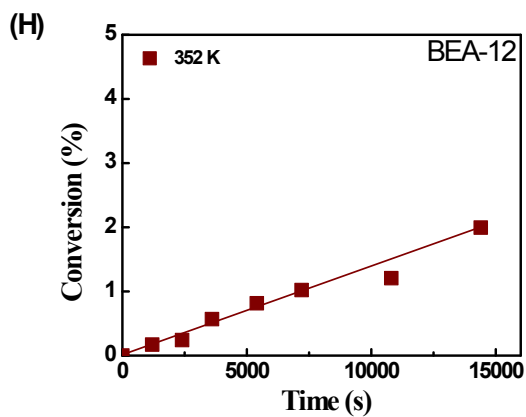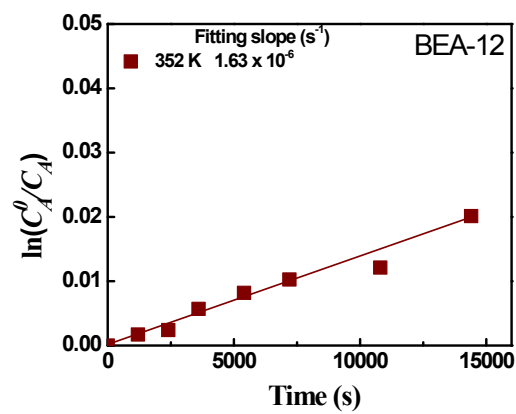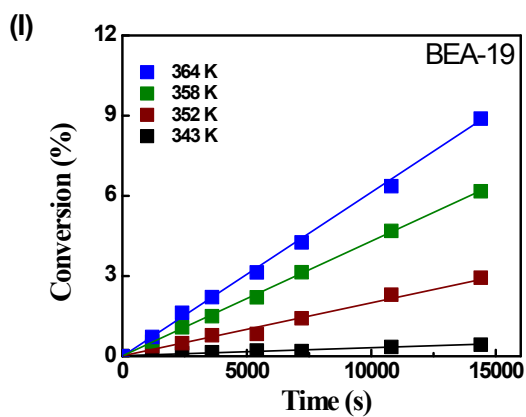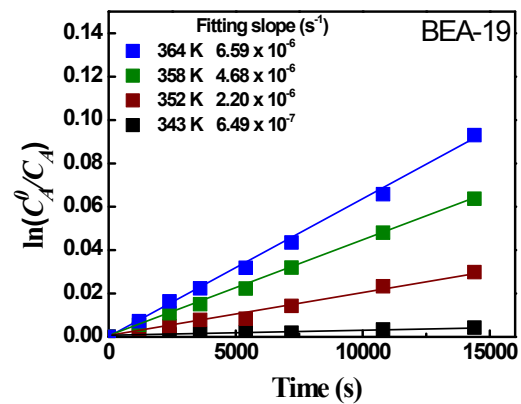

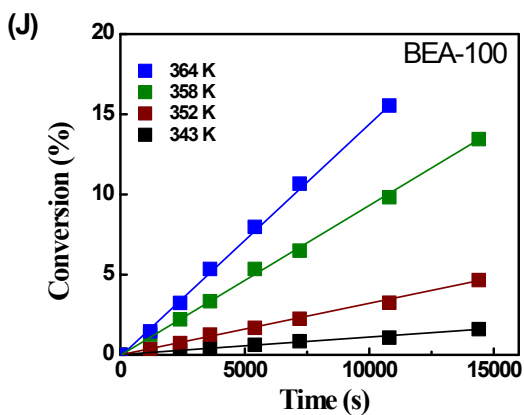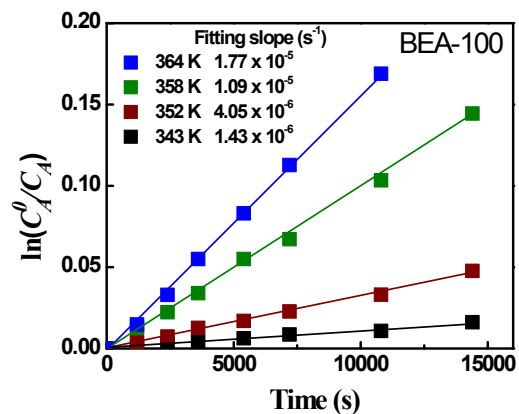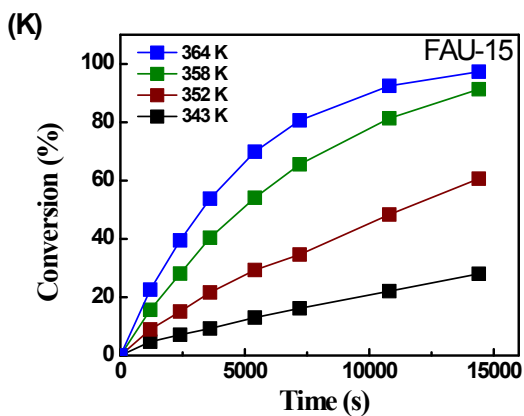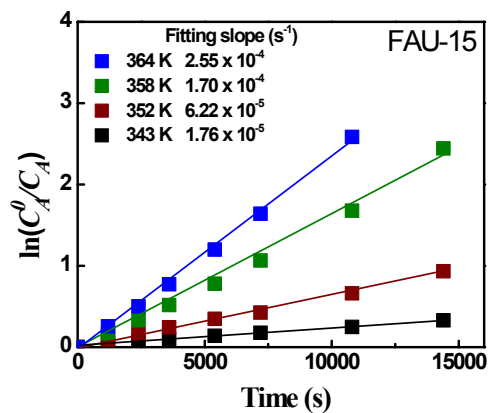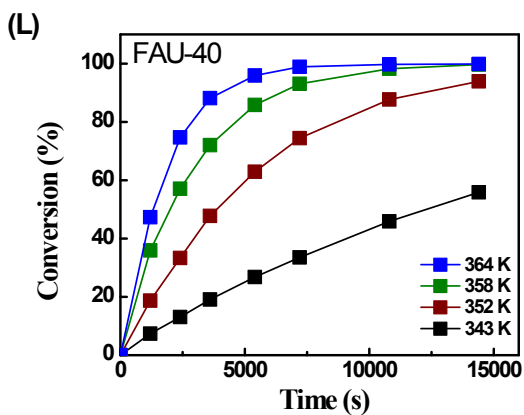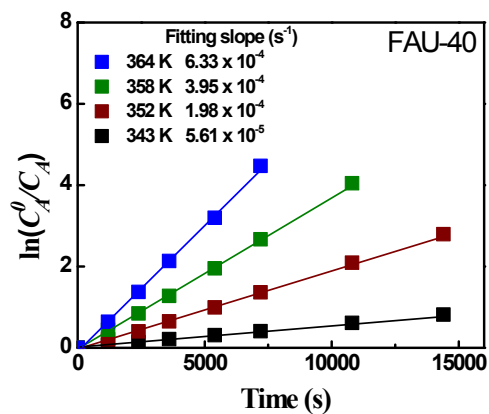

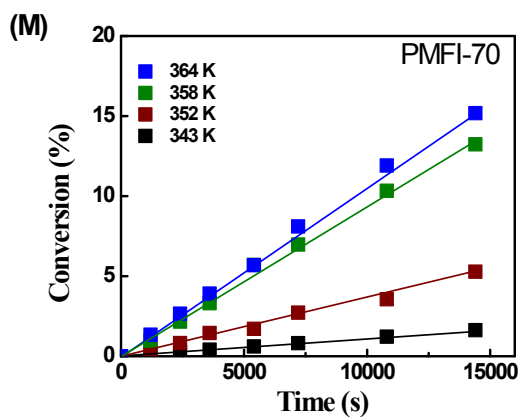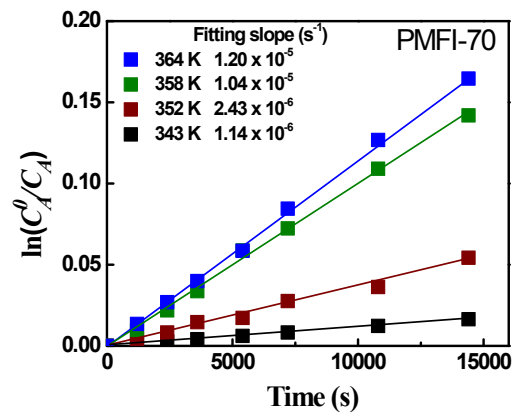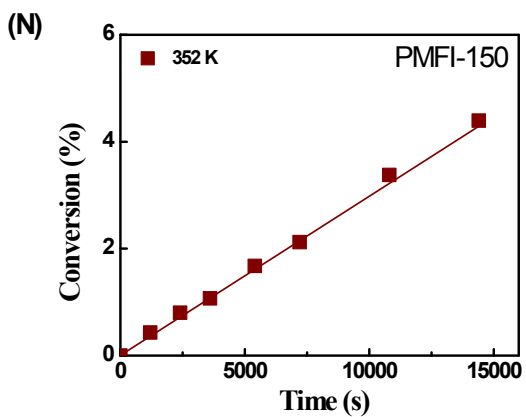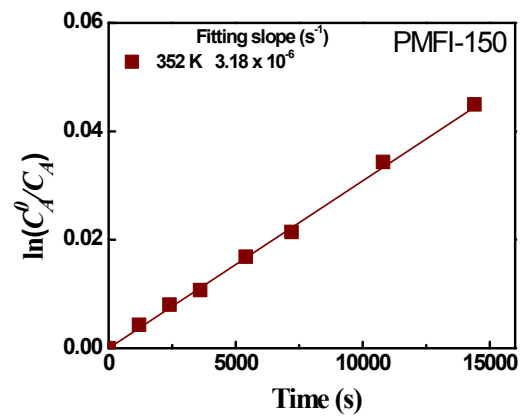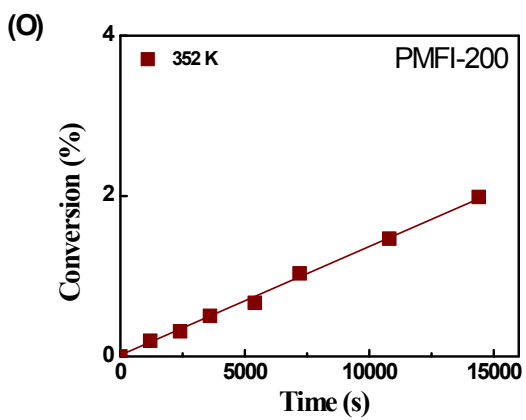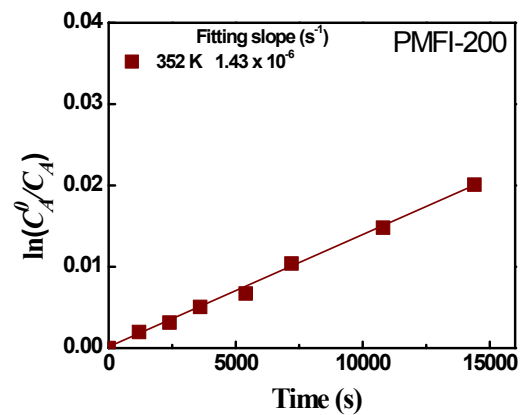

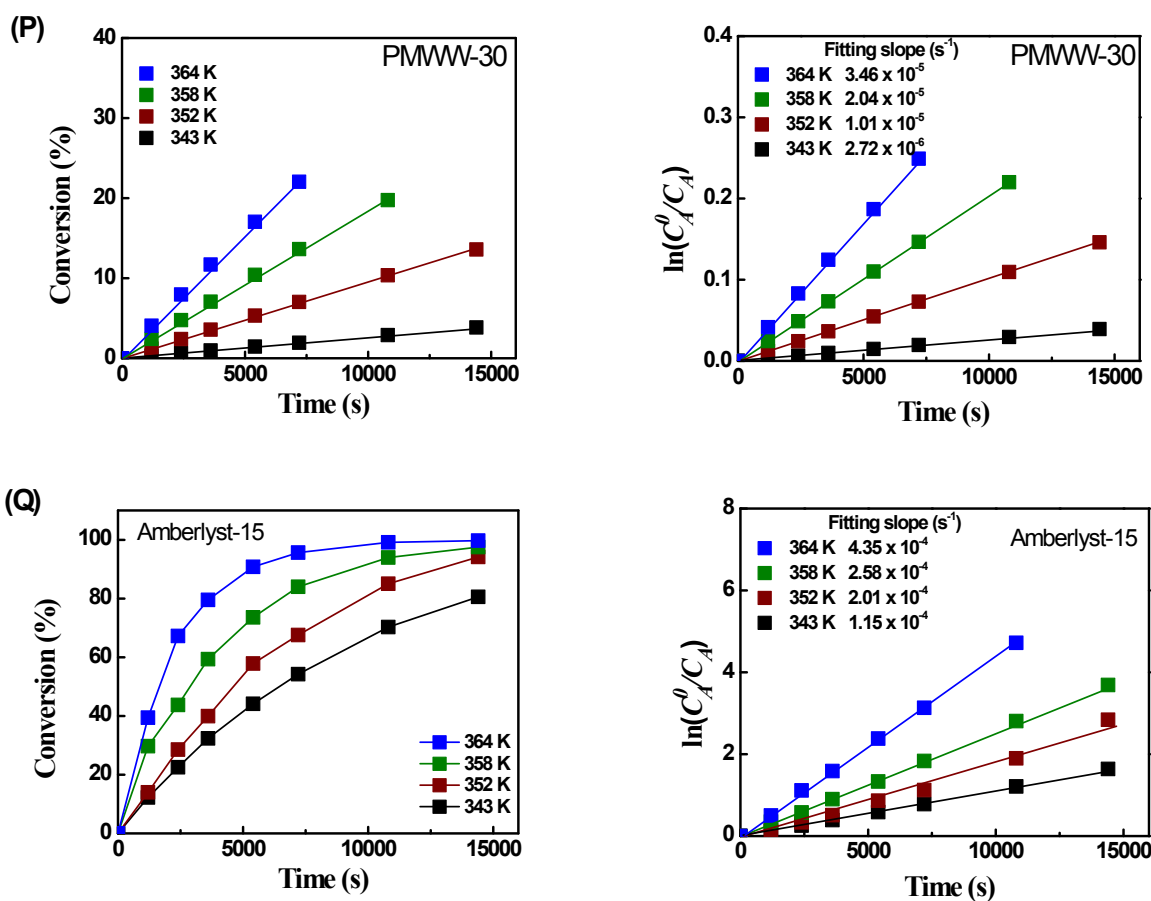

**Figure S1.** Plots for sucrose conversion as a function of reaction time and rate constant determination (next to plot for conversion vs. reaction time) for sucrose hydrolysis reactions over 0.2 g catalysts: (A) FER-28, (B) MFI-12, (C) MFI-40, (D) MFI-70, (E) MOR-45, (F) MWW-20, (G) MWW-30, (H) BEA-12, (I) BEA-19, (J) BEA-100, (K) FAU-15, (L) FAU-40, (M) PMFI-70, (N) PMFI-150, (O) PMFI-200, (P) PMWW, and (Q) Amberlyst-15. (The slope of each plot in rate determination is the measured rate constant,  $k_{\text{hydro}}M_B$  (mol s<sup>-1</sup>)).



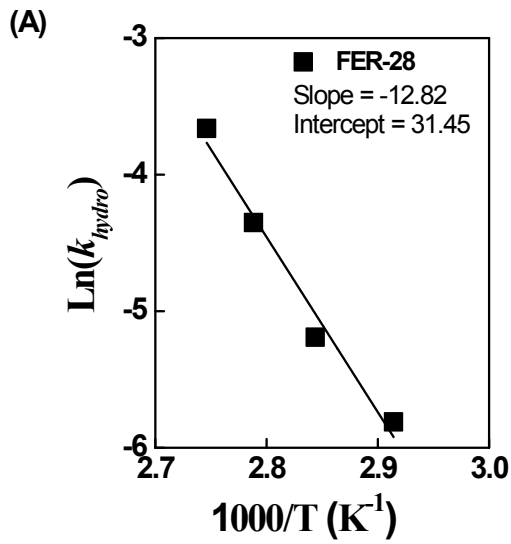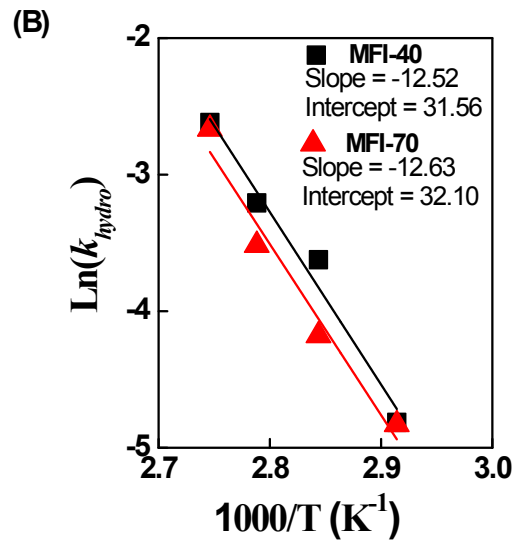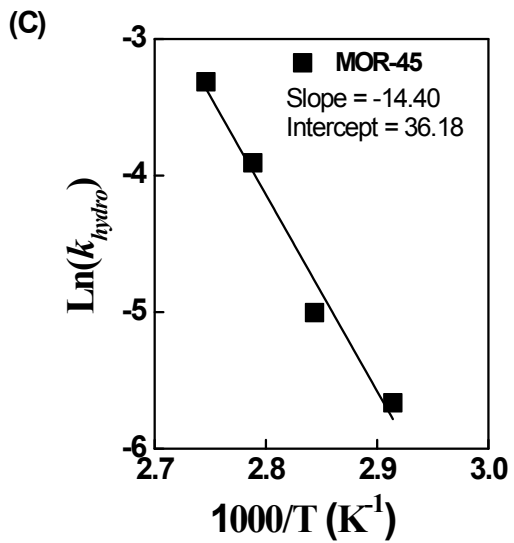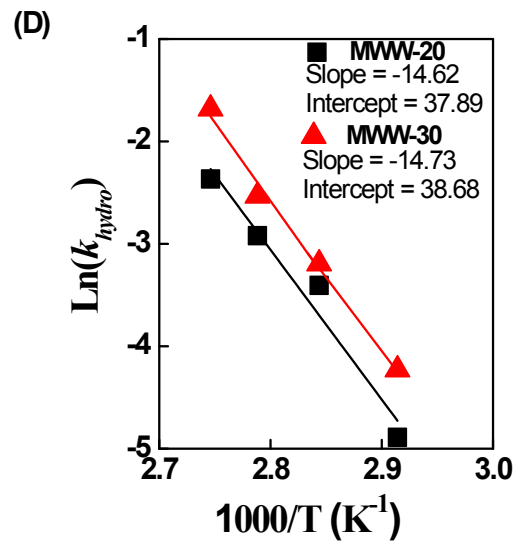

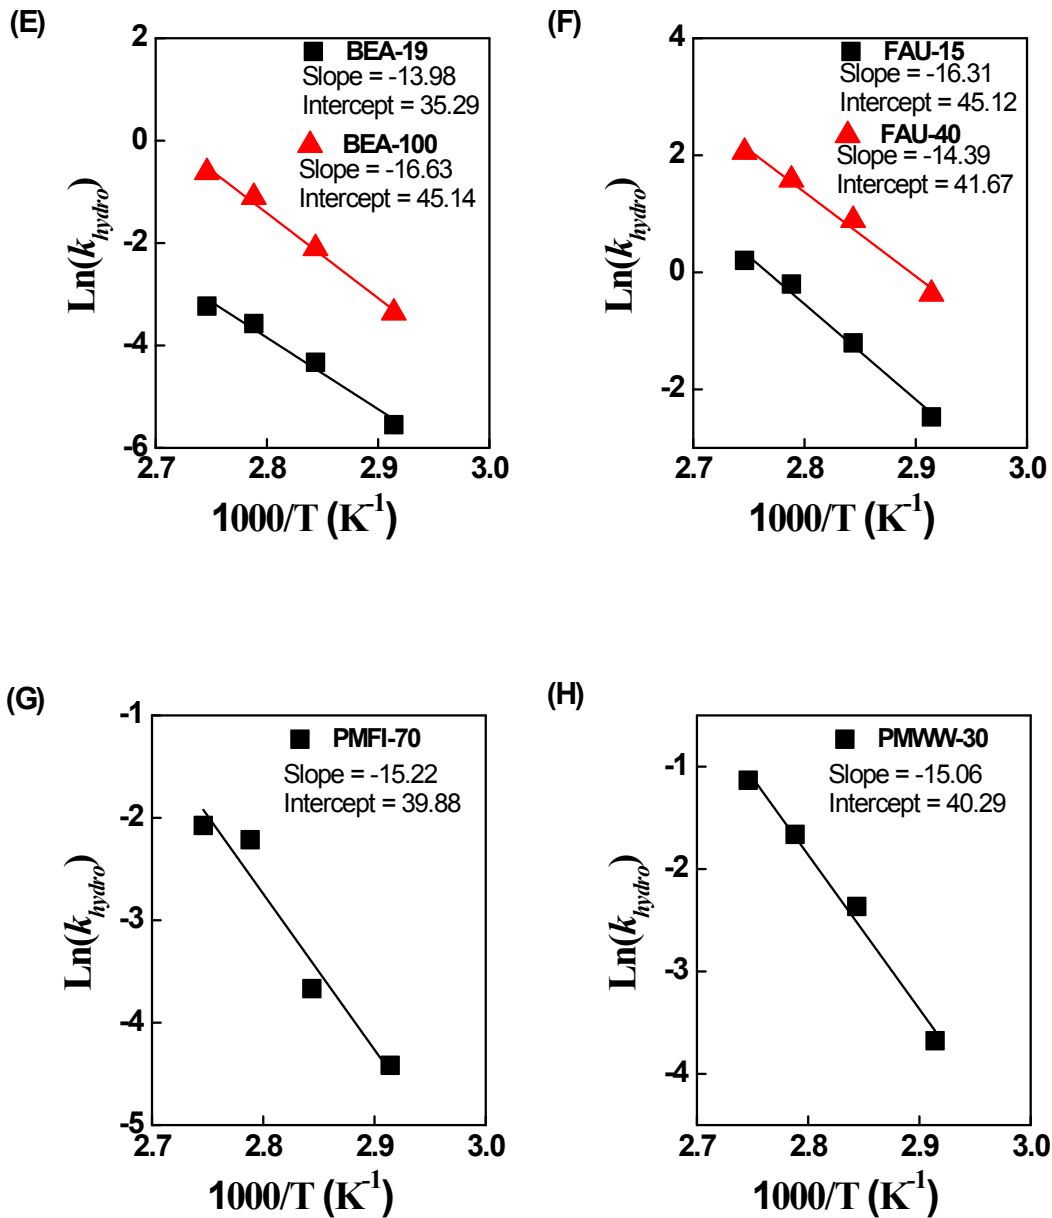

**Figure S2.** Plots for the measured activation energy and measured entropy determination in sucrose hydrolysis reactions over zeolite catalysts: (A) FER-28, (B) MFI-40 and MFI-70, (C) MOR-45, (D) MWW-20 and MWW-30, (E) BEA-19 and BEA-100, (F) FAU-15 and FAU-40, (G) PMFI-70, and (H) PMWW-30. (The slope and intercept of each plot are used for the measured activation energy ( $\Delta E_{\text{meas}}$ ) and measured entropy ( $\Delta S_{\text{meas}}$ ) determination).
